# Supplementary material for: Supervised categorical principal component analysis for genome-wide association analyses
Source: PubMed Central journal article supplement (PMC4046680; doi:10.1186/1471-2164-15-s1-s10), 2014-01-24
Supplement: 12864_2014_5683_MOESM1_ESM.pdf [file 12864_2014_5683_MOESM1_ESM.pdf]

| Pathway                                                              | No. of genes | No. of SNPs | Overlap |
|----------------------------------------------------------------------|--------------|-------------|---------|
| Peptide metabolic process                                            | 10           | 474         | Yes     |
| Lipid biosynthetic process                                           | 97           | 1100        | Yes     |
| Transcription initiation                                             | 35           | 279         | Yes     |
| Phospholipid biosynthetic process                                    | 39           | 334         | Yes     |
| Glycerophospholipid biosynthetic process                             | 30           | 158         | Yes     |
| Lipoprotein metabolic process                                        | 33           | 175         | Yes     |
| Membrane lipid biosynthetic process                                  | 49           | 619         | Yes     |
| Neuropeptide signaling pathway                                       | 14           | 95          |         |
| Steroid hormone receptor signaling pathway                           | 20           | 177         |         |
| Cytokinesis                                                          | 19           | 215         | Yes     |
| Activation of NF- $\kappa$ B transcription factor                    | 18           | 261         | Yes     |
| Positive regulation of transcription from RNA polymerase II promoter | 65           | 1511        |         |
| Cellular carbohydrate metabolic process                              | 122          | 1610        |         |
| Positive regulation of cytokine secretion                            | 10           | 117         | Yes     |
| Positive regulation of transcription factor activity                 | 24           | 294         | Yes     |
| Epidermis development                                                | 70           | 581         |         |
| Regulation of DNA binding                                            | 47           | 406         | Yes     |
| Positive regulation of binding                                       | 28           | 318         | Yes     |
| Interleukin 1 secretion                                              | 10           | 116         | Yes     |
| Muscle development                                                   | 92           | 1979        |         |
| Cellular catabolic process                                           | 209          | 2076        |         |
| Cellular lipid catabolic process                                     | 34           | 236         |         |
| Intracellular protein transport                                      | 139          | 1545        |         |
| Regulation of protein kinase activity                                | 151          | 1393        | Yes     |
| Glycoprotein metabolic process                                       | 88           | 1466        |         |
| Regulation of transcription factor activity                          | 40           | 375         | Yes     |
| Interleukin 8 production                                             | 11           | 74          | Yes     |
| Inflammatory response                                                | 124          | 1146        | Yes     |
| Positive regulation of cell proliferation                            | 142          | 1991        | Yes     |
| Protein targeting                                                    | 104          | 1202        |         |
| Response to virus                                                    | 49           | 313         | Yes     |
